# Supplementary material for: Increased Metabolite Levels of Glycolysis and Pentose Phosphate Pathway in Rabbit Atherosclerotic Arteries and Hypoxic Macrophage
Source: PubMed Central journal article supplement (PMC3900532; doi:10.1371/journal.pone.0086426), 2014-01-23
Supplement: pone.0086426.s001.pdf [file pone.0086426.s001.pdf]

Table S1. Sequences of primers used for qPCR analysis

| Gene                            | Forward                        | Reverse                         |
|---------------------------------|--------------------------------|---------------------------------|
| Interleukine-6                  | 5'-AAGCCAGAGCTGTGCAGATGAGTA-3' | 5'-TGTCCTGCAGCCACTGGTTC-3'      |
| Tumor necrosis factor- $\alpha$ | 5'-TGCTTGTTCCCTCAGCCTCTT-3'    | 5'-CAGAGGGCTGATTAGAGAGAGGT-3'   |
| Interleukine-1 $\beta$          | 5'-GCTGATGGCCCTAAACAGATGAA-3'  | 5'-TCCATGGCCACAACAACACTGAC-3'   |
| $\beta$ -actin                  | 5'-TGGCACCCAGCACAAATGAA-3'     | 5'-CTAAGTCATAGTCCGCCTAGAAGCA-3' |
