# Supplementary material for: Increased Metabolite Levels of Glycolysis and Pentose Phosphate Pathway in Rabbit Atherosclerotic Arteries and Hypoxic Macrophage
Source: PubMed Central journal article supplement (PMC3900532; doi:10.1371/journal.pone.0086426), 2014-01-23
Supplement: pone.0086426.s002.pdf [file pone.0086426.s002.pdf]

Table S2 Quantities of arterial metabolites

| Metabolite                     | HMDB ID                                               | Concentration (nmol/g)                                |                                                           |                                                                      | p value<br>one-way ANOVA<br>/ Bonferroni post test |          |
|--------------------------------|-------------------------------------------------------|-------------------------------------------------------|-----------------------------------------------------------|----------------------------------------------------------------------|----------------------------------------------------|----------|
|                                |                                                       | Conventional diet, non-injured artery<br>(normal)     | Conventional diet, injured artery<br>(SMC-rich neointima) | 0.5% cholesterol diet, injured artery<br>(macrophage-rich neointima) |                                                    |          |
|                                |                                                       | n=3, mean ± SD                                        | n=3, mean ± SD                                            | n=3, mean ± SD                                                       |                                                    |          |
| Glycolysis                     | Glucose 6-phosphate                                   | <a href="#">HMDB01401</a>                             | 14 ± 2                                                    | 24 ± 7.4                                                             | 18 ± 2.1                                           | 0.08     |
|                                | Fructose 6-phosphate                                  | <a href="#">HMDB00124</a>                             | 2.3 ± 0.5                                                 | 3.0 ± 1.2                                                            | 2.9 ± 0.3                                          | 0.51     |
|                                | Fructose 1,6-diphosphate                              | <a href="#">HMDB01058</a>                             | 2.9 ± 1.7                                                 | 5.6 ± 4.0                                                            | 26 ± 1.5                                           | *p<0.001 |
|                                | Dihydroxyacetone phosphate                            | <a href="#">HMDB01473</a>                             | 5.8 ± 0.3                                                 | 7.0 ± 1.9                                                            | 12 ± 1.8                                           | **p<0.05 |
|                                | Glyceraldehyde 3-phosphate                            | <a href="#">HMDB01112</a>                             | N.D.                                                      | N.D.                                                                 | N.D.                                               |          |
|                                | 3-Phosphoglyceric acid                                | <a href="#">HMDB00807</a>                             | 5.2 ± 1.1                                                 | 5.0 ± 1.4                                                            | 15 ± 0.6                                           | *p<0.001 |
|                                | 2-Phosphoglyceric acid                                | <a href="#">HMDB03391</a>                             | 3.6 ± 2.4                                                 | 2.3 ± 0.8                                                            | 2.5 ± 0.4                                          | 0.56     |
|                                | Phosphoenolpyruvic acid                               | <a href="#">HMDB00263</a>                             | 1.9 ± 0.3                                                 | 1.7 ± 0.8                                                            | 2.2 ± 0.6                                          | 0.35     |
|                                | Pyruvic acid                                          | <a href="#">HMDB00243</a>                             | 14 ± 1.6                                                  | 16 ± 7.4                                                             | 9.3 ± 1.5                                          | 0.22     |
| Lactic acid                    | <a href="#">HMDB00190</a> , <a href="#">HMDB01311</a> | 362 ± 60                                              | 1,034 ± 169                                               | 5,235 ± 1109                                                         | *p<0.001                                           |          |
| Pentose phosphate cycle        | 6-Phosphogluconic acid                                | <a href="#">HMDB01316</a>                             | 1.5 ± 0.6                                                 | 0.7 ± 0.4                                                            | 3.3 ± 0.8                                          | *p<0.05  |
|                                | Ribulose 5-phosphate                                  | <a href="#">HMDB00618</a>                             | 3.9 ± 0.5                                                 | 3.2 ± 1.0                                                            | 7.5 ± 1.0                                          | *p<0.01  |
|                                | Ribose 5-phosphate                                    | <a href="#">HMDB01548</a>                             | 1.6 ± 0.1                                                 | 1.3 ± 0.4                                                            | 2.8 ± 0.5                                          | *p<0.05  |
|                                | Sedoheptulose 7-phosphate                             | <a href="#">HMDB01068</a>                             | 2.0 ± 0.2                                                 | 2.9 ± 0.8                                                            | 2.7 ± 0.6                                          | 0.23     |
|                                | Erythrose 4-phosphate                                 | <a href="#">HMDB01321</a>                             | N.D.                                                      | N.D.                                                                 | 1.4 ± 0.3                                          | *p<0.001 |
|                                | Phosphoribosyl pyrophosphate                          | <a href="#">HMDB00280</a>                             | N.D.                                                      | N.D.                                                                 | N.D.                                               |          |
| Tricarboxylic acid cycle       | Acetyl CoA_divalent                                   | <a href="#">HMDB01206</a>                             | N.D.                                                      | 0.07 ± 0.1                                                           | 1.1 ± 0.8                                          | 0.05     |
|                                | Citric acid                                           | <a href="#">HMDB00094</a>                             | 30 ± 2.8                                                  | 50 ± 8.2                                                             | 112 ± 28                                           | *p<0.05  |
|                                | <i>cis</i> -Aconitic acid                             | <a href="#">HMDB00072</a>                             | 1.6 ± 0.1                                                 | 2.1 ± 0.3                                                            | 1.8 ± 0.4                                          | 0.25     |
|                                | Isocitric acid                                        | <a href="#">HMDB00193</a>                             | 2.1 ± 0.4                                                 | 2.7 ± 0.8                                                            | 3.0 ± 1.0                                          | 0.36     |
|                                | 2-Oxoglutaric acid                                    | <a href="#">HMDB00208</a>                             | 4.6 ± 1.3                                                 | 6.6 ± 1.3                                                            | 8.8 ± 3.4                                          | 0.2      |
|                                | Succinic acid                                         | <a href="#">HMDB00254</a>                             | 5.2 ± 0.5                                                 | 12 ± 3.1                                                             | 18 ± 6.7                                           | **p<0.05 |
|                                | Fumaric acid                                          | <a href="#">HMDB00134</a>                             | 2.9 ± 0.6                                                 | 3.6 ± 0.6                                                            | 16 ± 1.6                                           | *p<0.001 |
|                                | Malic acid                                            | <a href="#">HMDB00156</a> , <a href="#">HMDB00744</a> | 18 ± 2.9                                                  | 24 ± 4.9                                                             | 71 ± 1.5                                           | *p<0.001 |
| glyconeogenesis/glycogenolysis | Glucose 1-phosphate                                   | <a href="#">HMDB01586</a>                             | 1.4 ± 0.1                                                 | 2.1 ± 0.6                                                            | 6.2 ± 1.0                                          | *p<0.001 |
| fatty acid synthesis           | Malonyl CoA_divalent                                  | <a href="#">HMDB01175</a>                             | N.D.                                                      | N.D.                                                                 | N.D.                                               |          |
| Triacylglycerol synthesis      | Glycerol 3-phosphate                                  | <a href="#">HMDB00126</a>                             | 34 ± 0.4                                                  | 30 ± 7.9                                                             | 99 ± 18                                            | *p<0.01  |

Table S2 (continued)

|                               |                                              |                                       |                           |           |           |           |          |
|-------------------------------|----------------------------------------------|---------------------------------------|---------------------------|-----------|-----------|-----------|----------|
| Purine                        | Inosine monophosphate                        | <a href="#">HMDB00175</a>             | 5.9 ± 1.8                 | 4.9 ± 1.4 | 12 ± 1.0  | *p<0.001  |          |
|                               | Adenosine monophosphate                      | <a href="#">HMDB00045</a>             | 20 ± 8                    | 56 ± 55   | 200 ± 71  | *p<0.05   |          |
|                               | Adenosine diphosphate                        | <a href="#">HMDB01341</a>             | 118 ± 25                  | 163 ± 56  | 300 ± 23  | *p<0.05   |          |
|                               | Adenosine triphosphate                       | <a href="#">HMDB00538</a>             | 306 ± 82                  | 386 ± 145 | 897 ± 237 | *p<0.05   |          |
|                               | Cyclic adenosine 3',5'-phosphate             | <a href="#">HMDB00058</a>             | 0.9 ± 0.5                 | 0.6 ± 0.1 | 1.2 ± 0.4 | 0.32      |          |
|                               | Deoxyadenosine triphosphate                  | <a href="#">HMDB01532</a>             | N.D.                      | N.D.      | N.D.      |           |          |
|                               | Guanosine monophosphate                      | <a href="#">HMDB01397</a>             | 1.7 ± 0.2                 | 2.9 ± 1.8 | 13 ± 4.7  | *p<0.05   |          |
|                               | Guanosine diphosphate                        | <a href="#">HMDB01201</a>             | 5.8 ± 1.8                 | 12 ± 7.8  | 26 ± 4.6  | *p<0.05   |          |
|                               | Guanosine triphosphate                       | <a href="#">HMDB01273</a>             | 24 ± 10                   | 37 ± 18   | 54 ± 15   | 0.12      |          |
|                               | Cyclic 3',5'-guanosine monophosphate         | <a href="#">HMDB01314</a>             | N.D.                      | N.D.      | N.D.      |           |          |
|                               | Pyrimidine                                   | Uridine monophosphate                 | <a href="#">HMDB00288</a> | 2.2 ± 0.5 | 4.4 ± 2.7 | 24 ± 12   | **p<0.05 |
|                               |                                              | Uridine diphosphate                   | <a href="#">HMDB00295</a> | 4.8 ± 1.0 | 12 ± 11   | 44 ± 13   | *p<0.05  |
| Uridine triphosphate          |                                              | <a href="#">HMDB00285</a>             | 30 ± 8.7                  | 52 ± 20   | 73 ± 17   | **p<0.05  |          |
| Cytidine triphosphate         |                                              | <a href="#">HMDB00082</a>             | 2.8 ± 0.8                 | 3.7 ± 1.1 | 15 ± 5.5  | *p<0.01   |          |
| Cytidine-diphosphate          |                                              | <a href="#">HMDB01546</a>             | 0.7 ± 0.1                 | 1.8 ± 1.6 | 6.4 ± 1.7 | *p<0.05   |          |
| Cytidine monophosphate        |                                              | <a href="#">HMDB00095</a>             | 0.6 ± 0.1                 | 1.0 ± 0.7 | 5.2 ± 2.1 | *p<0.05   |          |
| Deoxycytidine triphosphate    |                                              | <a href="#">HMDB00998</a>             | N.D.                      | N.D.      | N.D.      |           |          |
| Deoxythymidine monophosphate  |                                              | <a href="#">HMDB01227</a>             | N.D.                      | N.D.      | N.D.      |           |          |
| Deoxythymidine 5'-diphosphate |                                              | <a href="#">HMDB01274</a>             | N.D.                      | N.D.      | N.D.      |           |          |
| Deoxythymidine triphosphate   |                                              | <a href="#">HMDB01342</a>             | N.D.                      | N.D.      | N.D.      |           |          |
| others                        |                                              | 2-Oxoisovaleric acid                  | <a href="#">HMDB00019</a> | 0.4 ± 0.1 | 0.5 ± 0.1 | 1.7 ± 0.2 | *p<0.001 |
|                               | Glycolic acid                                | <a href="#">HMDB00115</a>             | N.D.                      | N.D.      | 12 ± 5.2  | *p<0.01   |          |
|                               | Glyoxylic acid                               | <a href="#">HMDB00119</a>             | N.D.                      | N.D.      | N.D.      |           |          |
|                               | 3-Hydroxybutyric acid                        | <a href="#">HMDB00011,HMDB00357.H</a> | 4.2 ± 0.6                 | 6.9 ± 0.8 | 24 ± 1.7  | *p<0.001  |          |
|                               | 2-Hydroxybutyric acid                        | <a href="#">HMDB00008</a>             | N.D.                      | 0.8 ± 0.3 | 1.6 ± 0.2 | *p<0.05   |          |
|                               | Nicotinamide adenine dinucleotide*           | <a href="#">HMDB00902</a>             | 77 ± 17                   | 105 ± 11  | 131 ± 5   | **p<0.01  |          |
|                               | Nicotinamide adenine dinucleotide phosphate* | <a href="#">HMDB00217</a>             | 2.0 ± 0.9                 | 2.8 ± 0.8 | 8.0 ± 1.9 | *p<0.01   |          |
|                               | CoA_divalent                                 | <a href="#">HMDB01423</a>             | N.D.                      | N.D.      | N.D.      |           |          |
|                               | Gluconic acid                                | <a href="#">HMDB00625</a>             | 44 ± 10                   | 6.5 ± 1.5 | 14 ± 4.0  | ***p<0.01 |          |

\* femoral artery with macrophage-rich neointima vs. normal femoral artery and femoral artery with SMC-rich neointima

\*\* femoral artery with macrophage-rich neointima vs. normal femoral artery

\*\*\* normal femoral artery vs. femoral arteries with SMC-rich and macrophage-rich neointima

N.D.: not detected
