# Supplementary material for: Increased Metabolite Levels of Glycolysis and Pentose Phosphate Pathway in Rabbit Atherosclerotic Arteries and Hypoxic Macrophage
Source: PubMed Central journal article supplement (PMC3900532; doi:10.1371/journal.pone.0086426), 2014-01-23
Supplement: pone.0086426.s003.pdf [file pone.0086426.s003.pdf]

Table S3 Quantities of macrophage metabolites

| Pathway                        | Metabolites                  | HMDB ID                                               | Concentration (pmol/10 <sup>6</sup> cells)   |                                                                    |                                                                  | p value<br>one-way ANOVA<br>/Bonferroni post test |
|--------------------------------|------------------------------|-------------------------------------------------------|----------------------------------------------|--------------------------------------------------------------------|------------------------------------------------------------------|---------------------------------------------------|
|                                |                              |                                                       | PMA, normoxia<br>(control)<br>n=6, mean ± SD | PMA+LPS+INF $\gamma$ , normoxia<br>(M1 normoxia)<br>n=6, mean ± SD | PMA+LPS+INF $\gamma$ , hypoxia<br>(M1 hypoxia)<br>n=6, mean ± SD |                                                   |
| Glycolysis                     | Glucose 6-phosphate          | <a href="#">HMDB01401</a>                             | 3274 ± 247                                   | 1863 ± 163                                                         | 6147 ± 351                                                       | *<0.001, **<0.001                                 |
|                                | Fructose 6-phosphate         | <a href="#">HMDB00124</a>                             | 833 ± 79                                     | 569 ± 33                                                           | 1793 ± 71                                                        | *<0.001, **<0.001                                 |
|                                | Fructose 1,6-diphosphate     | <a href="#">HMDB01058</a>                             | 1034 ± 156                                   | 2113 ± 365                                                         | 11770 ± 1253                                                     | **<0.001                                          |
|                                | Dihydroxyacetone phosphate   | <a href="#">HMDB01473</a>                             | 310 ± 71                                     | 385 ± 83                                                           | 2346 ± 1395                                                      | **<0.01                                           |
|                                | Glyceraldehyde 3-phosphate   | <a href="#">HMDB01112</a>                             | 183 ± 17                                     | 289 ± 83                                                           | 625 ± 267                                                        | **<0.01                                           |
|                                | 3-Phosphoglyceric acid       | <a href="#">HMDB00807</a>                             | 434 ± 41                                     | 399 ± 47                                                           | 611 ± 52                                                         | **<0.001                                          |
|                                | 2-Phosphoglyceric acid       | <a href="#">HMDB03391</a>                             | N.D.                                         | N.D.                                                               | N.D.                                                             |                                                   |
|                                | Phosphoenolpyruvic acid      | <a href="#">HMDB00263</a>                             | 222 ± 30                                     | 182 ± 35                                                           | 245 ± 35                                                         | **<0.05                                           |
|                                | Pyruvic acid                 | <a href="#">HMDB00243</a>                             | N.D.                                         | N.D.                                                               | N.D.                                                             |                                                   |
|                                | Lactic acid                  | <a href="#">HMDB00190</a> , <a href="#">HMDB01311</a> | 74335 ± 3276                                 | 47872 ± 4622                                                       | 115892 ± 9843                                                    | *<0.001, **<0.001                                 |
| Pentose phosphate cycle        | 6-Phosphogluconic acid       | <a href="#">HMDB01316</a>                             | 225 ± 29                                     | 136 ± 13                                                           | 302 ± 32                                                         | *<0.001, **<0.001                                 |
|                                | Ribulose 5-phosphate         | <a href="#">HMDB00618</a>                             | 213 ± 35                                     | 177 ± 44                                                           | 781 ± 175                                                        | **<0.001                                          |
|                                | Ribose 5-phosphate           | <a href="#">HMDB01548</a>                             | 100 ± 46                                     | 71 ± 36                                                            | 246 ± 123                                                        | **<0.01                                           |
|                                | Sedoheptulose 7-phosphate    | <a href="#">HMDB01068</a>                             | 806 ± 70                                     | 939 ± 54                                                           | 1803 ± 59                                                        | *<0.01, **<0.001                                  |
|                                | Erythrose 4-phosphate        | <a href="#">HMDB01321</a>                             | N.D.                                         | N.D.                                                               | N.D.                                                             |                                                   |
|                                | Phosphoribosyl pyrophosphate | <a href="#">HMDB00280</a>                             | 1527 ± 256                                   | 614 ± 74                                                           | 759 ± 156                                                        | *<0.001                                           |
| Tricarboxylic acid cycle       | Acetyl CoA_divalent          | <a href="#">HMDB01206</a>                             | N.D.                                         | N.D.                                                               | N.D.                                                             |                                                   |
|                                | Citric acid                  | <a href="#">HMDB00094</a>                             | 14770 ± 402                                  | 12605 ± 835                                                        | 8712 ± 179                                                       | *<0.001, **<0.001                                 |
|                                | <i>cis</i> -Aconitic acid    | <a href="#">HMDB00072</a>                             | 889 ± 42                                     | 757 ± 50                                                           | 600 ± 25                                                         | *<0.001, **<0.001                                 |
|                                | Isocitric acid               | <a href="#">HMDB00193</a>                             | 701 ± 45                                     | 516 ± 34                                                           | 506 ± 14                                                         | *<0.001                                           |
|                                | 2-Oxoglutaric acid           | <a href="#">HMDB00208</a>                             | 1789 ± 259                                   | 2046 ± 122                                                         | 2540 ± 109                                                       | *<0.05, **<0.001                                  |
|                                | Succinic acid                | <a href="#">HMDB00254</a>                             | 822 ± 238                                    | 705 ± 149                                                          | 543 ± 97                                                         | 0.04                                              |
|                                | Fumaric acid                 | <a href="#">HMDB00134</a>                             | 1869 ± 60                                    | 1327 ± 129                                                         | 1331 ± 147                                                       | *<0.001                                           |
|                                | Malic acid                   | <a href="#">HMDB00156</a> , <a href="#">HMDB00744</a> | 7124 ± 107                                   | 5412 ± 420                                                         | 5010 ± 203                                                       | *<0.001, **<0.05                                  |
| glyconeogenesis/glycogenolysis | Glucose 1-phosphate          | <a href="#">HMDB01586</a>                             | 558 ± 29                                     | 603 ± 72                                                           | 1911 ± 75                                                        | **<0.001                                          |
| fatty acid synthesis           | Malonyl CoA_divalent         | <a href="#">HMDB01175</a>                             | N.D.                                         | N.D.                                                               | N.D.                                                             |                                                   |
| Triacylglycerol synthesis      | Glycerol 3-phosphate         | <a href="#">HMDB00126</a>                             | 8161 ± 508                                   | 4348 ± 280                                                         | 11827 ± 362                                                      | *<0.001, **<0.001                                 |

Table S3 (continued)

|                               |                                      |                           |                           |              |              |                   |
|-------------------------------|--------------------------------------|---------------------------|---------------------------|--------------|--------------|-------------------|
| Purine                        | Adenine                              | <a href="#">HMDB00034</a> | 11 ± 2                    | 9 ± 3        | 14 ± 4       | 0.54              |
|                               | Adenosine                            | <a href="#">HMDB00050</a> | 344 ± 25                  | 132 ± 41     | 126 ± 12     | *<0.001           |
|                               | Adenosine diphosphate                | <a href="#">HMDB01341</a> | 5886 ± 335                | 3501 ± 322   | 2981 ± 265   | *<0.001, **<0.05  |
|                               | Adenosine monophosphate              | <a href="#">HMDB00045</a> | 439 ± 52                  | 369 ± 36     | 343 ± 47     | *<0.05            |
|                               | Adenosine triphosphate               | <a href="#">HMDB00538</a> | 54954 ± 1458              | 43501 ± 2756 | 43320 ± 1384 | **<0.001          |
|                               | Cyclic 3',5'-guanosine monophosphate | <a href="#">HMDB01314</a> | N.D.                      | N.D.         | N.D.         |                   |
|                               | Cyclic adenosine 3',5'-monophosphate | <a href="#">HMDB00058</a> | N.D.                      | N.D.         | N.D.         |                   |
|                               | Deoxyadenosine triphosphate          | <a href="#">HMDB01532</a> | N.D.                      | N.D.         | N.D.         |                   |
|                               | Guanine                              | <a href="#">HMDB00132</a> | N.D.                      | N.D.         | N.D.         |                   |
|                               | Guanosine                            | <a href="#">HMDB00133</a> | 18 ± 5                    | N.D.         | 10 ± 0.3     | *<0.001           |
|                               | Guanosine diphosphate                | <a href="#">HMDB01201</a> | 908 ± 57                  | 699 ± 63     | 763 ± 58     | **<0.001          |
|                               | Guanosine monophosphate              | <a href="#">HMDB01397</a> | 122 ± 7                   | 119 ± 13     | 144 ± 42     | 0.2               |
|                               | Guanosine triphosphate               | <a href="#">HMDB01273</a> | 10947 ± 351               | 8841 ± 707   | 12749 ± 481  | *<0.001, **<0.001 |
|                               | Inosine                              | <a href="#">HMDB00195</a> | 44 ± 39                   | N.D.         | 80 ± 26      | *<0.05, **<0.001  |
|                               | Inosine monophosphate                | <a href="#">HMDB00175</a> | 240 ± 18                  | 276 ± 56     | 2717 ± 747   | **<0.001          |
|                               | S-Adenosylmethionine                 | <a href="#">HMDB01185</a> | 526 ± 72                  | 404 ± 31     | 394 ± 26     | *<0.01            |
|                               | Pirimidine                           | Cytidine                  | <a href="#">HMDB00089</a> | 108 ± 5      | 50 ± 9       | 69 ± 13           |
| Cytidine diphosphate          |                                      | <a href="#">HMDB01546</a> | 307 ± 24                  | 203 ± 37     | 164 ± 18     | *<0.001           |
| Cytidine monophosphate        |                                      | <a href="#">HMDB00095</a> | 75 ± 6                    | 57 ± 8       | 48 ± 3       | 0.0009            |
| Cytidine triphosphate         |                                      | <a href="#">HMDB00082</a> | 6101 ± 168                | 4722 ± 391   | 5330 ± 383   | *<0.001, **<0.05  |
| Cytosine                      |                                      | <a href="#">HMDB00630</a> | N.D.                      | N.D.         | N.D.         |                   |
| Deoxycytidine triphosphate    |                                      | <a href="#">HMDB00998</a> | N.D.                      | N.D.         | N.D.         |                   |
| Deoxythymidine 5'-diphosphate |                                      | <a href="#">HMDB01274</a> | N.D.                      | N.D.         | N.D.         |                   |
| Deoxythymidine monophosphate  |                                      | <a href="#">HMDB01227</a> | N.D.                      | N.D.         | N.D.         |                   |
| Deoxythymidine triphosphate   |                                      | <a href="#">HMDB01342</a> | N.D.                      | N.D.         | N.D.         |                   |
| Hypoxanthine                  |                                      | <a href="#">HMDB00157</a> | N.D.                      | N.D.         | 106 ± 87     | 0.11              |
| Thymidine                     |                                      | <a href="#">HMDB00273</a> | N.D.                      | N.D.         | N.D.         |                   |
| Thymine                       |                                      | <a href="#">HMDB00262</a> | N.D.                      | N.D.         | N.D.         |                   |
| Uracil                        |                                      | <a href="#">HMDB00300</a> | N.D.                      | N.D.         | N.D.         |                   |
| Uridine                       |                                      | <a href="#">HMDB00296</a> | N.D.                      | N.D.         | N.D.         |                   |
| Uridine diphosphate           |                                      | <a href="#">HMDB00295</a> | 806 ± 139                 | 343 ± 50     | 298 ± 42     | *<0.001           |
| Uridine monophosphate         |                                      | <a href="#">HMDB00288</a> | 135 ± 18                  | 129 ± 10     | 94 ± 26      | **<0.05           |
| Uridine triphosphate          |                                      | <a href="#">HMDB00285</a> | 9172 ± 195                | 5138 ± 597   | 6229 ± 284   | *<0.001, **<0.001 |

Table S3 (continued)

|            |                                    |                                       |               |                |                |                   |
|------------|------------------------------------|---------------------------------------|---------------|----------------|----------------|-------------------|
| Amino acid | 2-Hydroxybutyric acid              | <a href="#">HMDB00008</a>             | N.D.          | 176 ± 21       | 261 ± 21       | *<0.001, **<0.001 |
|            | 2-Oxoisovaleric acid               | <a href="#">HMDB00019</a>             | 39 ± 12       | N.D.           | 80             | 0.51              |
|            | 3-Hydroxybutyric acid              | <a href="#">HMDB00011,HMDB00357,H</a> | 180 ± 18      | 202 ± 36       | 272 ± 16       | **<0.05           |
|            | Alanine                            | <a href="#">HMDB00161,HMDB01310</a>   | 7319 ± 589    | 9388 ± 1081    | 13360 ± 515    | *<0.001, **<0.001 |
|            | Anthranilic acid                   | <a href="#">HMDB01123</a>             | 10 ± 1        | 17 ± 1         | 22 ± 7         | *<0.05            |
|            | Arginine                           | <a href="#">HMDB00517,HMDB03416</a>   | 6153 ± 255    | 6211 ± 978     | 8393 ± 705     | **<0.001          |
|            | Aspartic acid                      | <a href="#">HMDB00191,HMDB06483</a>   | 27771 ± 2195  | 21518 ± 1928   | 8156 ± 346     | *<0.001, **<0.001 |
|            | Asparagine                         | <a href="#">HMDB00168</a>             | 17579 ± 845   | 18864 ± 2521   | 22154 ± 927    | **<0.01           |
|            | Betaine                            | <a href="#">HMDB00043</a>             | 1135 ± 62     | 1137 ± 80      | 1143 ± 46      | 0.98              |
|            | Betaine aldehyde_+H <sub>2</sub> O | <a href="#">HMDB01252</a>             | N.D.          | N.D.           | N.D.           |                   |
|            | Carnosine                          | <a href="#">HMDB00033</a>             | 95 ± 6        | 52 ± 6         | 60 ± 3         | *<0.001           |
|            | Choline                            | <a href="#">HMDB00097</a>             | 1738 ± 163    | 4110 ± 353     | 7853 ± 887     | *<0.001, **<0.001 |
|            | Citrulline                         | <a href="#">HMDB00904</a>             | 42 ± 5        | 37 ± 6         | 60 ± 4         | **<0.001          |
|            | Creatine                           | <a href="#">HMDB00064</a>             | 6084 ± 371    | 6219 ± 586     | 6403 ± 447     | 0.52              |
|            | Creatinine                         | <a href="#">HMDB00562</a>             | 252 ± 18      | 243 ± 22       | 251 ± 26       | 0.73              |
|            | Cysteine                           | <a href="#">HMDB00574,HMDB03417</a>   | 411 ± 431     | 257 ± 83       | 64 ± 25        | 0.09              |
|            | Glutamic acid                      | <a href="#">HMDB00148,HMDB03339</a>   | 224692 ± 5795 | 220431 ± 21017 | 224011 ± 11292 | 0.86              |
|            | Glutamine                          | <a href="#">HMDB00641,HMDB03423</a>   | 18831 ± 3188  | 33488 ± 4303   | 53780 ± 3210   | *<0.001, **<0.001 |
|            | Glycine                            | <a href="#">HMDB00123</a>             | 56622 ± 1412  | 55635 ± 5831   | 63204 ± 3282   | **<0.01           |
|            | Glycolic acid                      | <a href="#">HMDB00115</a>             | N.D.          | N.D.           | N.D.           |                   |
|            | Glyoxylic acid                     | <a href="#">HMDB00119</a>             | N.D.          | N.D.           | N.D.           |                   |
|            | Histidine                          | <a href="#">HMDB00177</a>             | 2537 ± 162    | 2553 ± 310     | 3325 ± 147     | **<0.001          |
|            | Homoserine                         | <a href="#">HMDB00719</a>             | N.D.          | N.D.           | N.D.           |                   |
|            | Hydroxyproline                     | <a href="#">HMDB00725</a>             | 6933 ± 383    | 7054 ± 694     | 8775 ± 280     | **<0.001          |
|            | Isoleucine                         | <a href="#">HMDB00172</a>             | 7104 ± 308    | 7041 ± 965     | 9103 ± 258     | **<0.001          |
|            | Leucine                            | <a href="#">HMDB00687</a>             | 6178 ± 395    | 6473 ± 758     | 8390 ± 377     | **<0.001          |
|            | Lysine                             | <a href="#">HMDB00182,HMDB03405</a>   | 1349 ± 116    | 1538 ± 222     | 2224 ± 182     | **<0.001          |
|            | Methionine                         | <a href="#">HMDB00696</a>             | 1897 ± 143    | 1820 ± 207     | 2384 ± 128     | **<0.001          |
|            | <i>N,N</i> -Dimethylglycine        | <a href="#">HMDB00092</a>             | N.D.          | N.D.           | N.D.           |                   |
|            | Ornithine                          | <a href="#">HMDB00214,HMDB03374</a>   | 295 ± 28      | 277 ± 48       | 421 ± 64       | **<0.001          |
|            | Phenylalanine                      | <a href="#">HMDB00159</a>             | 2195 ± 142    | 2118 ± 316     | 3039 ± 91      | **<0.001          |

Table S3 (continued)

|                                                          |                     |                                     |                           |               |               |                   |
|----------------------------------------------------------|---------------------|-------------------------------------|---------------------------|---------------|---------------|-------------------|
| Amino acid                                               | Proline             | <a href="#">HMDB00162,HMDB03411</a> | 5375 ± 297                | 7250 ± 1030   | 8338 ± 436    | *<0.001, **<0.05  |
|                                                          | Putrescine          | <a href="#">HMDB01414</a>           | 49 ± 1                    | 11            | N.D.          | *<0.001           |
|                                                          | Sarcosine           | <a href="#">HMDB00271</a>           | 29 ± 6                    | N.D.          | N.D.          | *<0.001           |
|                                                          | Serine              | <a href="#">HMDB00187,HMDB03406</a> | 3305 ± 173                | 8652 ± 811    | 9791 ± 420    | *<0.001, **<0.01  |
|                                                          | Spermidine          | <a href="#">HMDB01257</a>           | 279 ± 52                  | 213 ± 27      | 237 ± 32      | *<0.05            |
|                                                          | Spermine            | <a href="#">HMDB01256</a>           | 318 ± 118                 | 246 ± 40      | 274 ± 34      | 0.27              |
|                                                          | Threonine           | <a href="#">HMDB00167</a>           | 5252 ± 300                | 5783 ± 819    | 7623 ± 353    | **<0.001          |
|                                                          | Tryptophan          | <a href="#">HMDB00929</a>           | 48 ± 3                    | 45 ± 8        | 53 ± 10       | 0.27              |
|                                                          | Tyramine            | <a href="#">HMDB00306</a>           | N.D.                      | N.D.          | N.D.          |                   |
|                                                          | Tyrosine            | <a href="#">HMDB00158</a>           | 2397 ± 154                | 2345 ± 323    | 3159 ± 112    | **<0.001          |
|                                                          | Valine              | <a href="#">HMDB00883</a>           | 3368 ± 158                | 3495 ± 510    | 4704 ± 198    | **<0.001          |
|                                                          | β-Alanine           | <a href="#">HMDB00056</a>           | 5353 ± 466                | 2773 ± 185    | 2322 ± 95     | *<0.001, **<0.05  |
|                                                          | γ-Aminobutyric acid | <a href="#">HMDB00112</a>           | 222 ± 24                  | 662 ± 97      | 889 ± 43      | *<0.001, **<0.001 |
|                                                          | Other               | CoA_divalent                        | <a href="#">HMDB01423</a> | 223 ± 150     | 252 ± 57      | 205 ± 113         |
| Gluconic acid                                            |                     | <a href="#">HMDB00625</a>           | 563 ± 46                  | 279 ± 32      | 358 ± 15      | *<0.001, **<0.01  |
| Glutathione (GSH)                                        |                     | <a href="#">HMDB00125</a>           | 71447 ± 58740             | 83748 ± 17663 | 49246 ± 27353 | 0.32              |
| Glutathione (GSSG)_divalent                              |                     | <a href="#">HMDB03337</a>           | 33149 ± 18559             | 18161 ± 12879 | 30432 ± 9962  | 0.19              |
| Nicotinamide adenine dinucleotide phosphate <sup>+</sup> |                     | <a href="#">HMDB00217</a>           | 614 ± 64                  | 367 ± 97      | 435 ± 42      | *<0.001           |
| Nicotinamide adenine dinucleotide <sup>+</sup>           |                     | <a href="#">HMDB00902</a>           | 5797 ± 405                | 2890 ± 291    | 2661 ± 139    | *<0.001           |

\* control vs. M1 normoxia

\*\* M1 normoxia vs. M1 hypoxia

N.D.: not detected

PMA: phorbol 12-myristate 13-acetate, LPS: lipopolysaccharide, INF-γ: interferon-γ
