# Supplementary material for: Increased Metabolite Levels of Glycolysis and Pentose Phosphate Pathway in Rabbit Atherosclerotic Arteries and Hypoxic Macrophage
Source: PubMed Central journal article supplement (PMC3900532; doi:10.1371/journal.pone.0086426), 2014-01-23
Supplement: pone.0086426.s004.pdf [file pone.0086426.s004.pdf]

Table S4 Relation between plasminogen activator inhibitor-1 and metabolite levels

| Pathway                        | Metabolites                  | HMDB ID                                               | correlation coefficient | p value |
|--------------------------------|------------------------------|-------------------------------------------------------|-------------------------|---------|
| Glycolysis                     | Glucose 6-phosphate          | <a href="#">HMDB01401</a>                             | -0.23                   | 0.3611  |
|                                | Fructose 6-phosphate         | <a href="#">HMDB00124</a>                             | -0.34                   | 0.1731  |
|                                | Fructose 1,6-diphosphate     | <a href="#">HMDB01058</a>                             | -0.59                   | <0.01   |
|                                | Dihydroxyacetone phosphate   | <a href="#">HMDB01473</a>                             | -0.45                   | 0.0634  |
|                                | Glyceraldehyde 3-phosphate   | <a href="#">HMDB01112</a>                             | -0.56                   | <0.05   |
|                                | 3-Phosphoglyceric acid       | <a href="#">HMDB00807</a>                             | -0.37                   | 0.1282  |
|                                | Phosphoenolpyruvic acid      | <a href="#">HMDB00263</a>                             | 0.09                    | 0.715   |
|                                | Lactic acid                  | <a href="#">HMDB00190</a> , <a href="#">HMDB01311</a> | -0.16                   | 0.5268  |
| Pentose phosphate cycle        | 6-Phosphogluconic acid       | <a href="#">HMDB01316</a>                             | 0.00                    | 0.9957  |
|                                | Ribulose 5-phosphate         | <a href="#">HMDB00618</a>                             | -0.45                   | 0.0589  |
|                                | Ribose 5-phosphate           | <a href="#">HMDB01548</a>                             | -0.25                   | 0.3202  |
|                                | Sedoheptulose 7-phosphate    | <a href="#">HMDB01068</a>                             | -0.62                   | <0.01   |
|                                | Phosphoribosyl pyrophosphate | <a href="#">HMDB00280</a>                             | 0.86                    | <0.0001 |
| Tricarboxylic acid cycle       | Citric acid                  | <a href="#">HMDB00094</a>                             | 0.77                    | <0.001  |
|                                | <i>cis</i> -Aconitic acid    | <a href="#">HMDB00072</a>                             | 0.81                    | <0.0001 |
|                                | Isocitric acid               | <a href="#">HMDB00193</a>                             | 0.93                    | <0.0001 |
|                                | 2-Oxoglutaric acid           | <a href="#">HMDB00208</a>                             | -0.72                   | <0.001  |
|                                | Succinic acid                | <a href="#">HMDB00254</a>                             | 0.53                    | <0.05   |
|                                | Fumaric acid                 | <a href="#">HMDB00134</a>                             | 0.91                    | <0.0001 |
|                                | Malic acid                   | <a href="#">HMDB00156</a> , <a href="#">HMDB00744</a> | 0.94                    | <0.0001 |
| glyconeogenesis/glycogenolysis | Glucose 1-phosphate          | <a href="#">HMDB01586</a>                             | -0.55                   | <0.05   |
| Triacylglycerol synthesis      | Glycerol 3-phosphate         | <a href="#">HMDB00126</a>                             | -0.03                   | 0.901   |

Table S4 (continued)

|                      |                           |                           |        |         |
|----------------------|---------------------------|---------------------------|--------|---------|
| Purine               | Adenine                   | <a href="#">HMDB00034</a> | 0.03   | 0.9056  |
|                      | Adenosine                 | <a href="#">HMDB00050</a> | 0.95   | <0.0001 |
|                      | Adenosine diphosphate     | <a href="#">HMDB01341</a> | 0.95   | <0.0001 |
|                      | Adenosine monophosphate   | <a href="#">HMDB00045</a> | 0.67   | <0.01   |
|                      | Adenosine triphosphate    | <a href="#">HMDB00538</a> | 0.93   | <0.0001 |
|                      | Guanosine                 | <a href="#">HMDB00133</a> | 0.87   | <0.0001 |
|                      | Guanosine diphosphate     | <a href="#">HMDB01201</a> | 0.79   | <0.0001 |
|                      | Guanosine monophosphate   | <a href="#">HMDB01397</a> | -0.14  | 0.5702  |
|                      | Guanosine triphosphate    | <a href="#">HMDB01273</a> | 0.00   | 0.9876  |
|                      | Inosine                   | <a href="#">HMDB00195</a> | -0.01  | 0.9656  |
|                      | Inosine monophosphate     | <a href="#">HMDB00175</a> | -0.51  | <0.05   |
| S-Adenosylmethionine | <a href="#">HMDB01185</a> | 0.78                      | 0.0001 |         |
| Pyrimidine           | Cytidine                  | <a href="#">HMDB00089</a> | 0.88   | <0.0001 |
|                      | Cytidine diphosphate      | <a href="#">HMDB01546</a> | 0.87   | <0.0001 |
|                      | Cytidine monophosphate    | <a href="#">HMDB00095</a> | 0.70   | <0.01   |
|                      | Cytidine triphosphate     | <a href="#">HMDB00082</a> | 0.75   | <0.001  |
|                      | Hypoxanthine              | <a href="#">HMDB00157</a> | -0.26  | 0.2918  |
|                      | Uridine diphosphate       | <a href="#">HMDB00295</a> | 0.91   | <0.0001 |
|                      | Uridine monophosphate     | <a href="#">HMDB00288</a> | 0.48   | <0.05   |
|                      | Uridine triphosphate      | <a href="#">HMDB00285</a> | 0.91   | <0.0001 |

Table S4 (continued)

|            |                       |                                         |       |         |
|------------|-----------------------|-----------------------------------------|-------|---------|
| Amino acid | 2-Oxoisovaleric acid  | <a href="#">HMDB00019</a>               | 0.10  | 0.6984  |
|            | 3-Hydroxybutyric acid | <a href="#">HMDB00011, HMDB00357, H</a> | -0.60 | <0.01   |
|            | Alanine               | <a href="#">HMDB00161, HMDB01310</a>    | -0.74 | <0.001  |
|            | Anthranilic acid      | <a href="#">HMDB01123</a>               | -0.70 | <0.01   |
|            | Arginine              | <a href="#">HMDB00517, HMDB03416</a>    | -0.47 | 0.051   |
|            | Aspartic acid         | <a href="#">HMDB00191, HMDB06483</a>    | 0.74  | <0.001  |
|            | Asparagine            | <a href="#">HMDB00168</a>               | -0.59 | <0.05   |
|            | Betaine               | <a href="#">HMDB00043</a>               | -0.06 | 0.822   |
|            | Carnosine             | <a href="#">HMDB00033</a>               | 0.92  | <0.0001 |
|            | Choline               | <a href="#">HMDB00097</a>               | -0.79 | 0.0001  |
|            | Citrulline            | <a href="#">HMDB00904</a>               | -0.32 | 0.1895  |
|            | Creatine              | <a href="#">HMDB00064</a>               | -0.27 | 0.2822  |
|            | Creatinine            | <a href="#">HMDB00562</a>               | 0.15  | 0.565   |
|            | Cysteine              | <a href="#">HMDB00574, HMDB03417</a>    | 0.40  | 0.0994  |
|            | Glutamic acid         | <a href="#">HMDB00148, HMDB03339</a>    | 0.07  | 0.7916  |
|            | Glutamine             | <a href="#">HMDB00641, HMDB03423</a>    | -0.81 | <0.0001 |
|            | Glycine               | <a href="#">HMDB00123</a>               | -0.29 | 0.24    |
|            | Histidine             | <a href="#">HMDB00177</a>               | -0.48 | <0.05   |
|            | Hydroxyproline        | <a href="#">HMDB00725</a>               | -0.52 | <0.05   |
|            | Isoleucine            | <a href="#">HMDB00172</a>               | -0.44 | 0.071   |
|            | Leucine               | <a href="#">HMDB00687</a>               | -0.56 | <0.05   |
|            | Lysine                | <a href="#">HMDB00182, HMDB03405</a>    | -0.63 | <0.01   |
|            | Methionine            | <a href="#">HMDB00696</a>               | -0.37 | 0.136   |
|            | Ornithine             | <a href="#">HMDB00214, HMDB03374</a>    | -0.33 | 0.1865  |
|            | Phenylalanine         | <a href="#">HMDB00159</a>               | -0.44 | 0.0698  |

Table S4 (continued)

|                                                          |                             |                                     |                           |         |
|----------------------------------------------------------|-----------------------------|-------------------------------------|---------------------------|---------|
| Amino acid                                               | Proline                     | <a href="#">HMDB00162,HMDB03411</a> | -0.84                     | <0.0001 |
|                                                          | Putrescine                  | <a href="#">HMDB01414</a>           | 0.97                      | <0.0001 |
|                                                          | Sarcosine                   | <a href="#">HMDB00271</a>           | 0.96                      | <0.0001 |
|                                                          | Serine                      | <a href="#">HMDB00187,HMDB03406</a> | -0.96                     | <0.0001 |
|                                                          | Spermidine                  | <a href="#">HMDB01257</a>           | 0.48                      | <0.05   |
|                                                          | Spermine                    | <a href="#">HMDB01256</a>           | 0.29                      | 0.2435  |
|                                                          | Threonine                   | <a href="#">HMDB00167</a>           | -0.63                     | <0.01   |
|                                                          | Tryptophan                  | <a href="#">HMDB00929</a>           | -0.02                     | 0.9439  |
|                                                          | Tyrosine                    | <a href="#">HMDB00158</a>           | -0.44                     | 0.0701  |
|                                                          | Valine                      | <a href="#">HMDB00883</a>           | -0.54                     | <0.05   |
|                                                          | $\beta$ -Alanine            | <a href="#">HMDB00056</a>           | 0.95                      | <0.0001 |
|                                                          | $\gamma$ -Aminobutyric acid | <a href="#">HMDB00112</a>           | -0.92                     | <0.0001 |
|                                                          | Other                       | CoA_divalent                        | <a href="#">HMDB01423</a> | -0.07   |
| Gluconic acid                                            |                             | <a href="#">HMDB00625</a>           | 0.90                      | <0.0001 |
| Glutathione (GSH)                                        |                             | <a href="#">HMDB00125</a>           | 0.03                      | 0.9155  |
| Glutathione (GSSG)_divalent                              |                             | <a href="#">HMDB03337</a>           | 0.30                      | 0.2189  |
| Nicotinamide adenine dinucleotide phosphate <sup>+</sup> |                             | <a href="#">HMDB00217</a>           | 0.97                      | <0.0001 |
| Nicotinamide adenine dinucleotide <sup>+</sup>           |                             | <a href="#">HMDB00902</a>           | 0.80                      | <0.0001 |
